# Supplementary material
Source: PubMed Central journal article supplement (PMC2850150)
Supplement: vetres-41-45-s1.pdf [file vetres-41-45-s1.pdf]

## **On line material**

### Supplementary tables

**Table S1.** Median times (days) for the duration of the latent and subclinical periods in domestic animals predicted from the fitted Weibull model (Tab. IV in the manuscript).

|             | Cattle | Pig  | Small ruminants |
|-------------|--------|------|-----------------|
| Latency     | 3.1    | 2.42 | 3.2             |
| Subclinical | 1.92   | 1.7  | 1.81            |

**Table S2.** Median times (days) for a combination of selected variables predicted from the fitted Weibull model for the duration of the latent and subclinical periods (Tab. IV in the manuscript).

|             | Exposed to same donor specie |      |                 | Exposed to different donor specie |      |                 |
|-------------|------------------------------|------|-----------------|-----------------------------------|------|-----------------|
|             | Cattle                       | Pig  | Small ruminants | Cattle                            | Pig  | Small ruminants |
| Latency     | 2.96                         | 1.66 | 3.7             | 3.25                              | 4.23 | 3.15            |
| Subclinical | 1.87                         | 1.22 | 2.28            | 1.98                              | 2.82 | 1.76            |

**Table S3.** Median times (days) for a combination of selected variables predicted from the fitted Weibull model for the duration of the latent and subclinical periods (Tab. IV in the manuscript).

|             | Fever  |     |                 | First vesicles in mouth or feet |      |                 | Generalized infection |      |                 |
|-------------|--------|-----|-----------------|---------------------------------|------|-----------------|-----------------------|------|-----------------|
|             | Cattle | Pig | Small ruminants | Cattle                          | Pig  | Small ruminants | Cattle                | Pig  | Small ruminants |
| Latency     | -      | -   | 2.93            | 2.93                            | 2.24 | 2.93            | 3.7                   | 2.97 | 3.7             |
| Subclinical | -      | -   | 1.53            | 1.83                            | 1.65 | 1.78            | 2.26                  | 1.87 | 2.04            |

**Table S4.** Median times (days) for a combination of selected variables predicted from the fitted Weibull model for the incubation period (Tab. V in the manuscript).

|                 | Exposed to same donor specie |                  | Exposed to different donor specie |                  |
|-----------------|------------------------------|------------------|-----------------------------------|------------------|
|                 | Direct contact               | Indirect contact | Direct contact                    | Indirect contact |
| Cattle          | 4.9                          |                  | 4.55                              | 5.72             |
| Pig             | 2.9                          | 4.4              | 10.57                             | 10.33            |
| Small ruminants | 6.43                         | 13.09            | 7.22                              | 4.2              |

**Table S5.** Median times (days) for a combination of selected variables predicted from the fitted Weibull model for the incubation period (Tab. V in the manuscript).

|                 | Exposed to same donor specie |                                 |                       | Exposed to different donor specie |                                 |                       |
|-----------------|------------------------------|---------------------------------|-----------------------|-----------------------------------|---------------------------------|-----------------------|
|                 | Fever                        | First vesicles in mouth or feet | Generalized infection | Fever                             | First vesicles in mouth or feet | Generalized infection |
| Cattle          | -                            | 4.97                            | 2.9                   | -                                 | 4.22                            | 5.72                  |
| Pig             | -                            | 3.04                            | 3.47                  | -                                 | 10.57                           | 10.33                 |
| Small ruminants | -                            | 6.28                            | 8.77                  | 3.4                               | 7.22                            | 5.1                   |

**Table S6.** Median times (days) for a combination of selected variables predicted from the fitted Weibull model for the incubation period (Tab. V in the manuscript).

|                 | Direct contact |                              |      |                                    | Indirect contact |                              |      |                                    |
|-----------------|----------------|------------------------------|------|------------------------------------|------------------|------------------------------|------|------------------------------------|
|                 | Pan Asia       | Euro – SA (European strains) | MESA | Euro – SA (South American strains) | Pan Asia         | Euro – SA (European strains) | MESA | Euro – SA (South American strains) |
| Cattle          | 2.71           | 5.35                         | -    | 4.47                               | 10.33            | 4.95                         | -    | -                                  |
| Pig             | 2.9            | 10.57                        | -    | -                                  | 7.03             | -                            | -    | -                                  |
| Small ruminants | 8.1            | 8.5                          | 6.28 | 6.39                               | 9.5              | 3.78                         | -    | -                                  |
